# Supplementary material
Source: PubMed Central journal article supplement (PMC4248728)
Supplement: MCB.01089-14_zmb999100660so2.pdf [file MCB.01089-14_zmb999100660so2.pdf]

**Supplementary Table 1**

Position of putative transcription factor binding sequences present in the PHO89 promoter  
Higher probability sequences are denoted in bold.

| <b>factor</b> | <b>start</b> | <b>end</b>  | <b>sequence</b>     | <b>weight</b> | <b>Pvalue</b>  | <b>ln(Pval)</b> |
|---------------|--------------|-------------|---------------------|---------------|----------------|-----------------|
| Crz1          | -620         | -612        | CGAAGCCAG           | 6.1           | 4.8e-04        | -7.642          |
| Mig1/2        | -584         | -578        | CACCCGC             | 4.5           | 8.3e-04        | -7.094          |
| Crz1          | -555         | -547        | TCGCGCCAC           | 6.8           | 2.8e-04        | -8.181          |
| <b>Crz1</b>   | <b>-513</b>  | <b>-505</b> | <b>CACAGCCAC</b>    | <b>8.6</b>    | <b>2.0e-05</b> | <b>-10.820</b>  |
| <b>Mig1/2</b> | <b>-466</b>  | <b>-460</b> | <b>CCCCACG</b>      | <b>8.4</b>    | <b>7.5e-05</b> | <b>-9.498</b>   |
| Pho4          | -464         | -457        | CAACGTGG            | 7.3           | 1.6e-04        | -8.740          |
| <b>Nrg1/2</b> | <b>-440</b>  | <b>-429</b> | <b>TTAAGGGCCCAC</b> | <b>8.8</b>    | <b>1.3e-05</b> | <b>-11.251</b>  |
| <b>Pho4</b>   | <b>-324</b>  | <b>-317</b> | <b>CCACGTGC</b>     | <b>10.3</b>   | <b>1.3e-05</b> | <b>-11.251</b>  |
| <b>Crz1</b>   | <b>-275</b>  | <b>-267</b> | <b>CACAGCCAC</b>    | <b>8.6</b>    | <b>2.0e-05</b> | <b>-10.820</b>  |
| Nrg1/2        | -265         | -254        | AGAAGGATCCAA        | 0.4           | 9.4e-04        | -6.970          |
| Crz1          | -166         | -158        | CTAAGCCCG           | 6.4           | 3.8e-04        | -7.875          |
