# Supplementary material
Source: PubMed Central journal article supplement (PMC4248728)
Supplement: MCB.01089-14_zmb999100660so3.pdf [file MCB.01089-14_zmb999100660so3.pdf]

**SupplementaryTable 2. Oligonucleotides used in this work**

| Oligo name          | Sequence                                                               | Description                                                                     |
|---------------------|------------------------------------------------------------------------|---------------------------------------------------------------------------------|
| PHO89-C-pFA6-dir    | ATGGTATCATTGGAATGCTCCTCGCTTTGGTGTGGAATACCAATGACACGGATCCCCGGGTTAATTA    | Construction of strain with chromosomally GFP/3xHA-tagged <i>PHO89</i> locus    |
| PHO89-C-pFA6-rev    | AGTTCTACCTAATGTTGTAATACTGTATTACATAACCGAAACACATTATGAGAATTCGAGCTCGTTAAAC | Construction of strain with chromosomally GFP/3xHA-tagged <i>PHO89</i> locus    |
| pho89_5'_CDRE2_m    | GATGTCACAGTAACTTTGGATCCTTCTATT                                         | Mutagenesis of CDRE2 (-274/-267)                                                |
| pho89_3'_CDRE2_m    | ATCCAAAGTTACTGTGACATCTAGTATTGGAC                                       | Mutagenesis of CDRE2 (-274/-267)                                                |
| PHO89_5_CDRE1       | GGGTGTGTATGTGCGATAGACCTTTTT                                            | Mutagenesis of CDRE1 (-513/-507)                                                |
| PHO89_3_CDRE1       | ATCGCACATACACACACCCTTGTGGTGAAGC                                        | Mutagenesis of CDRE1 (-513/-507)                                                |
| RT_PHO89_up1        | TCTGGAAGGGTTCTCCAAAC                                                   | <i>PHO89</i> RT-PCR                                                             |
| RT_PHO89_do1        | GAAGCAATTGCACCTGTGAG                                                   | <i>PHO89</i> RT-PCR                                                             |
| RT_ACT1_up2         | TGCTGTCTTCCCATCTATCG                                                   | <i>ACT1</i> RT-PCR                                                              |
| RT_ACT1_do2         | ATTGAGCTTCATCACCAAC                                                    | <i>ACT1</i> RT-PCR                                                              |
| MIG1-C-pFA6-dir     | AAACATTACCACCATAAGAAGTTTACCCTTCCCTTCCACACATGGACCGGATCCCCGGGTTAATTA     | Construction of strain with chromosomal GFP or 3xHA-tagged <i>MIG1</i> locus    |
| MIG1-C-pFA6-rev     | TTGTCTATTGCTTTTGTATTTATCTGCACCGCCAAAACCTTGTGAGCGTAGAATTCGAGCTCGTTAAAC  | Construction of strain with chromosomal GFP or 3xHA-tagged <i>MIG1</i> locus    |
| MIG2-C-pFA6-dir     | TACGTAACCTACTGAAACAAATTGATGTTTTCAACGGTCCCAAAAGAGTTCGGATCCCCGGGTTAATTA  | Construction of strain with chromosomally GFP or 3xHA-tagged <i>MIG2</i> locus  |
| MIG2-C-pFA6-rev     | ATGACAGTTCTAGAGGAAAAATGGTGAGATAAAAAGGGGCCGTAAGGGAATTCGAGCTCGTTAAAC     | Construction of strain with chromosomally GFP or 3xHA-tagged <i>MIG2</i> locus  |
| CRZ1-C-pFA6-dir     | TCACTCCCTTGTACGAAGAAGCCAGACAGGAGAAATCGGGACAAGAGAGTCCGATCCCCGGGTTAATTA  | Construction of strain with chromosomally GFP or 3xHA-tagged <i>CRZ1</i> locus  |
| CRZ1-C-pFA6-rev     | TTATATAGAAAAAAATTCCTATTCAAAGCTTAAAAAACAAAAAAGAATTCGAGCTCGTTAAAC        | Construction of strain with chromosomally GFP or 3xHA-tagged <i>CRZ1</i> locus  |
| NRG1-C-pFA6-dir     | GACATGATAATTGCTTGAACACTATAGAACACATTTGAAAAAGGGACAACGGATCCCCGGGTTAATTA   | Construction of strain with chromosomally GFP or 3xHA-tagged <i>NRG1</i> locus  |
| NRG1-C-pFA6-rev     | AGTGCGGAATAGTAGTACTGCTAATGAGAAAAACACGGGTATACCGTCAAGAATTCGAGCTCGTTAAAC  | Construction of strain with chromosomally GFP or 3xHA-tagged <i>NRG1</i> locus  |
| NRG2_pFA6_dir       | CTCATGCAACAAGAAGAAAAAAGAACTGGAAGAGGAGGGAGGCTAGCAGTCGGATCCCCGGGTTAATTA  | Construction of strain with chromosomally GFP or 3xHA-tagged <i>NRG2</i> locus  |
| NRG2_pFA6_rev       | ATTTGTACGTTATTTGAATATTTAAATGTTTTGGCTGAGCTCACTCACAGAATTCGAGCTCGTTAAAC   | Construction of strain with chromosomally GFP or 3xHA-tagged <i>NRG2</i> locus  |
| 18Right             | CAGCACGTGGGAGACAATA                                                    | PCR for <i>PHO89</i> CDRE2 region                                               |
| 23Left              | AGATGTCCACCCAGTAGACA                                                   | PCR for <i>PHO89</i> CDRE2 region                                               |
| 5'_CRZ1_disr        | TAGCAGTTGAGCTCCAGC                                                     | amplification of <i>crz1::kanMX4</i> cassette from disruption library           |
| 3'_CRZ1_disr        | GCTCTAGAACAGTGGCTCGTACC                                                | amplification of <i>crz1::kanMX4</i> cassette from disruption library           |
| 5'-reg1_disr        | GGAGAACAAGAAGCCATAAAAG                                                 | amplification of <i>reg1::kanMX4</i> cassette from disruption library           |
| 3'-reg1_disr        | CGAGTTGTGCTTAAACAAGCC                                                  | amplification of <i>reg1::kanMX4</i> cassette from disruption library           |
| PHO84_prom_5'       | GCGAATTCAGTATTACGCACGTTGG                                              | Cloning of <i>PHO84</i> promoter and ORF in pMM15 for HA-tagged expression      |
| Clon_PHO84_3'       | CGGGATCCTGCTTCATGTTGAAGTTGAG                                           | Cloning of <i>PHO84</i> promoter and ORF in pMM15 for HA-tagged expression      |
| Pho89_prom_5'       | CGGAATTCCTTACATCCGTTTAAATTC                                            | Cloning of <i>PHO89</i> promoter and ORF in pMM17 for HA-tagged expression      |
| Pho89_3'_SacI       | CCGAGCTCTGTCATTTGGTATCCACACC                                           | Cloning of <i>PHO89</i> promoter and ORF in pMM17 for HA-tagged expression      |
| PHO89_PROM_5_1      | CGGAATTCATTATTTGTTAGTGGG                                               | amplification of <i>pho89::kanMX4</i> cassette from disruption library          |
| pho89_3'_KanMX_2    | ATACACATAGCCATGCCAGG                                                   | amplification of <i>pho89::kanMX4</i> cassette from disruption library          |
| pho89_orf_5'        | GGCTTTACATCAATTTGAC                                                    | amplification of <i>pho89::TRP1</i> cassette from strain PAM1                   |
| pho89_orf_3'        | TGTCATTTGGTATCCACAC                                                    | amplification of <i>pho89::TRP1</i> cassette from strain PAM1                   |
| ENA1-c-pFA6-dir     | TACTACAATCCATACAGAAATTAATATTGGTATTAACAACGGATCCCCGGGTTAATTA             | Construction of strain with chromosomally 3xHA-tagged <i>ENA1</i> locus         |
| ENA1-c-pFA6-rev     | TGAATAAGGAAAAAGATAGGGAGCACTTAATAGGCCCTGCGAATTCGAGCTCGTTAAAC            | Construction of strain with chromosomally 3xHA-tagged <i>ENA1</i> locus         |
| ENA1-pFA6-comp-Cter | AACTTTACAAGTGTGAAAGAG                                                  | Verification of non-specific ENA cluster integration 3x-HA tagging              |
| ENA1-pFA6-comp-Nter | ATAATCTCGTTTGCCATGC                                                    | Verification of specific ENA1 integration 3x-HA tagging                         |
| pFA6a_3HA_rev       | GAACATCGTATGGGTAAGAT                                                   | Verification of non-specific and specific ENA cluster integration 3x-HA tagging |
